# Supplementary material for: Novel ruthenium–terpyridyl complex for direct oxidation of amines to nitriles
Source: Royal Society of Chemistry journal article supplement (doi:10.1039/c3cy00209h), 2013-01-01
Supplement: c3cy00209h.pdf [file c3cy00209h.pdf]

## Supporting Information

### **Novel ruthenium-terpyridyl complex for direct oxidation of amines to nitriles**

Liliana Cristian, Simona Nica, Octavian D. Pavel, Constantin Mihailciuc,  
Valer Almasan, Christopher Hardacre, Walter Leitner and Vasile I.  
Parvulescu

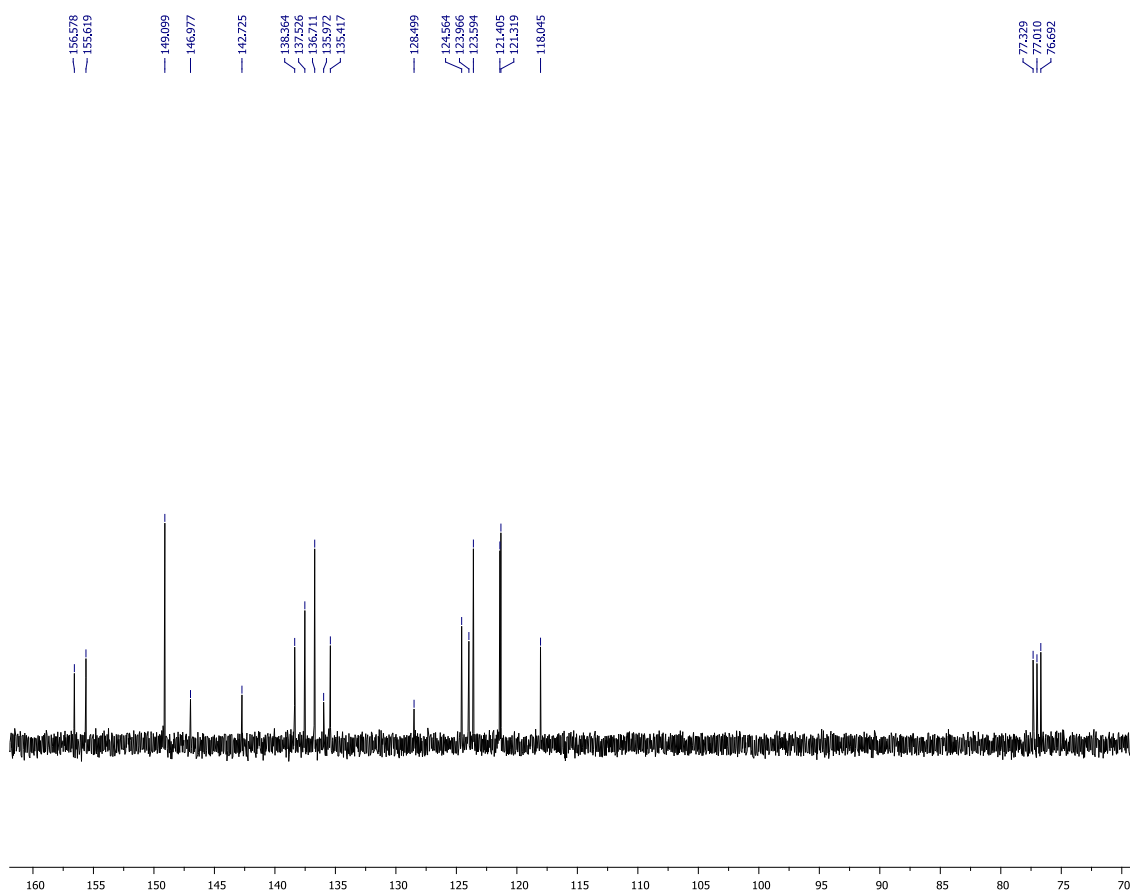

Figure 1S.  $^{13}\text{C}$  NMR spectrum of the terpyridyl ligand



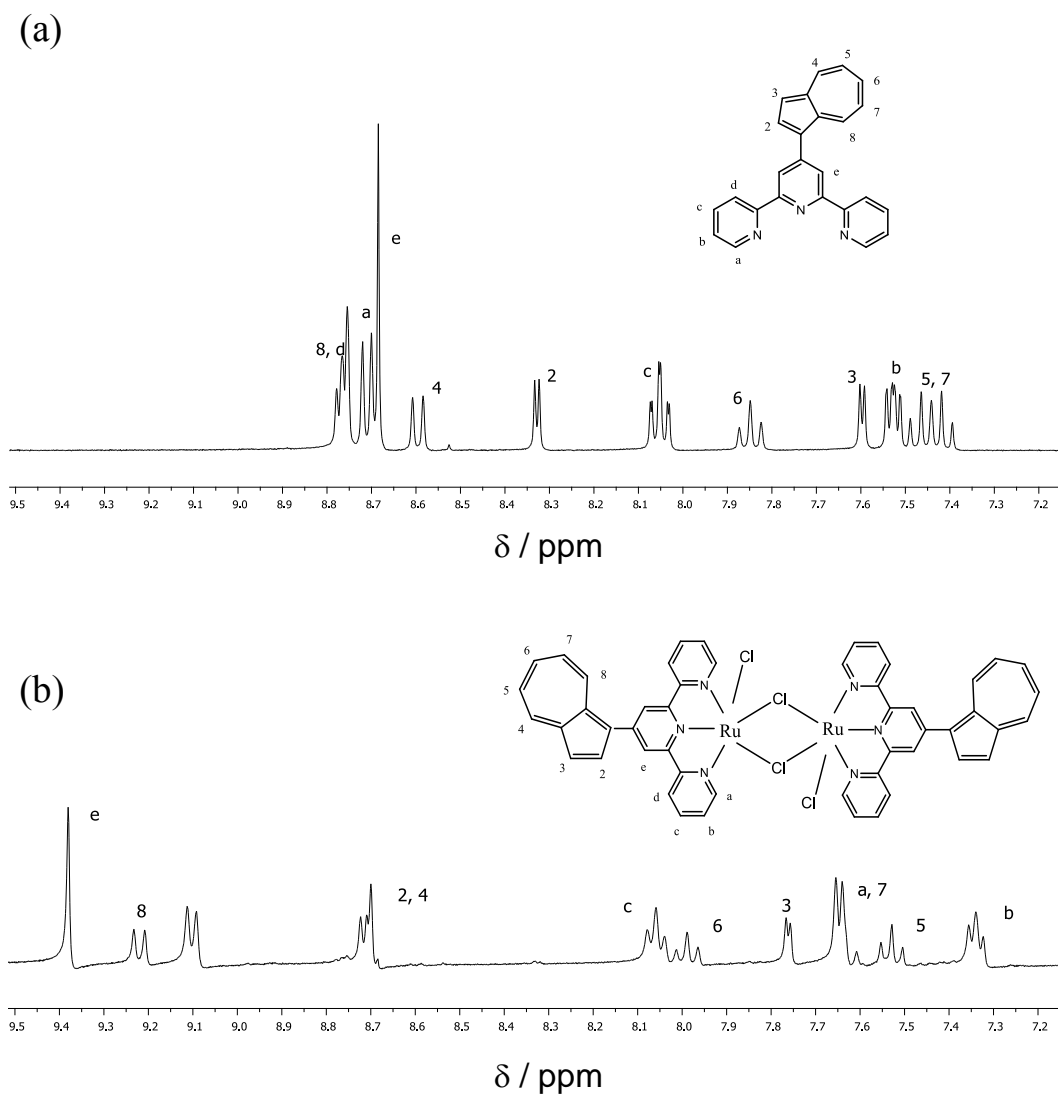

Figure 2S.  $^1\text{H}$ -NMR spectra of the terpyridyl ligand (a) and of the ruthenium-terpyridyl complex (b).

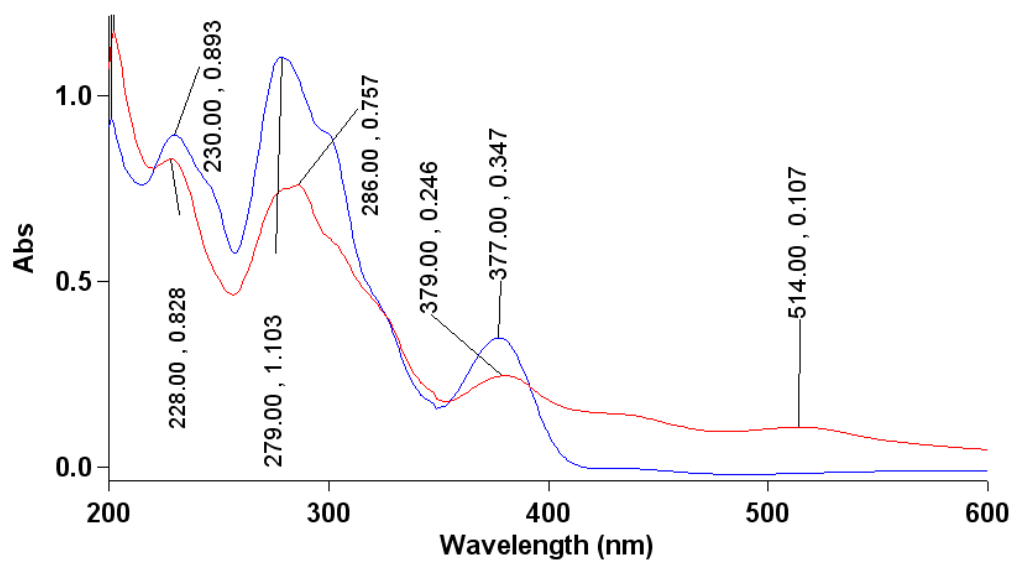

Figure 3S. Comparative DR-UV-Vis spectra of the terpyridyl ligand (blue) and Ru-terpyridyl complex (red)
